# Supplementary material
Source: PubMed Central journal article supplement (PMC187902)
Supplement: pnas_100_17_9962__2.pdf [file pnas_100_17_9962__2.pdf]

**Table 1. Mutations identified in viral RNA amplified from serum of the persistently infected tamarin T12025 between weeks 40 and 48 of infection**

| Nucleotide<br>Position | pGBV-B/2<br>AY243572 | T12025<br>Virus | Location    | AA<br>Residue | pGBV-B/2   | T12025<br>Virus |
|------------------------|----------------------|-----------------|-------------|---------------|------------|-----------------|
| 1612                   | A                    | G               | E2          | 389           | Pro        | -               |
| 1849                   | C                    | T               | E2          | 468           | Gly        | -               |
| <b>2783</b>            | <b>T</b>             | <b>G</b>        | <b>NS2</b>  | <b>780</b>    | <b>Phe</b> | <b>Glu</b>      |
| 3001                   | T                    | C               | NS2         | 852           | Val        | -               |
| 3793                   | A                    | C               | NS3         | 1116          | Gly        | -               |
| <b>4396</b>            | <b>C</b>             | <b>A</b>        | <b>NS3</b>  | <b>1317</b>   | <b>Asn</b> | <b>Lys</b>      |
| 4435                   | T                    | C               | NS3         | 1330          | Tyr        | -               |
| <b>5090</b>            | <b>A</b>             | <b>G</b>        | <b>NS3</b>  | <b>1549</b>   | <b>Thr</b> | <b>Ala</b>      |
| 5212                   | T                    | G               | NS4A        | 1589          | Arg        | -               |
| <b>5225</b>            | <b>G</b>             | <b>A</b>        | <b>NS4A</b> | <b>1594</b>   | <b>Ala</b> | <b>Thr</b>      |
| 5305                   | C                    | T               | NS4B        | 1620          | Pro        | -               |
| 6061                   | T                    | C               | NS5A        | 1872          | Ile        | -               |
| <b>6993</b>            | <b>T</b>             | <b>C</b>        | <b>NS5A</b> | <b>2183</b>   | <b>Met</b> | <b>Thr</b>      |
| <b>7031</b>            | <b>T</b>             | <b>C</b>        | <b>NS5A</b> | <b>2196</b>   | <b>Phe</b> | <b>Leu</b>      |
| <b>7152</b>            | <b>T</b>             | <b>C</b>        | <b>NS5A</b> | <b>2236</b>   | <b>Val</b> | <b>Ala</b>      |
| <b>7248</b>            | <b>G</b>             | <b>A</b>        | <b>NS5A</b> | <b>2268</b>   | <b>Gly</b> | <b>Glu</b>      |
| 7303                   | C                    | T               | NS5B        | 2286          | Phe        | -               |
| 7357                   | C                    | T               | NS5B        | 2304          | Leu        | -               |
| 7711                   | C                    | T               | NS5B        | 2422          | Thr        | -               |
| <b>8402</b>            | <b>T</b>             | <b>C</b>        | <b>NS5B</b> | <b>2653</b>   | <b>Tyr</b> | <b>His</b>      |
| <b>8942</b>            | <b>A</b>             | <b>G</b>        | <b>NS5B</b> | <b>2833</b>   | <b>Ile</b> | <b>Val</b>      |
| <b>8969</b>            | <b>T</b>             | <b>G</b>        | <b>NS5B</b> | <b>2842</b>   | <b>Phe</b> | <b>Val</b>      |
| 9299                   | G                    | A               | 3'NTR*      | NA            | NA         | NA              |

Nonsilent mutations are bold. –, amino acids identical to parental GBV-B/2 residues. Mutations at nucleotides 5090, 6061, and 8942 were present at week 40 or 42, but partly or completely reverted to the pGBV-B/2 sequence at week 44 or 48. NA, not applicable. The two nonsilent mutations (Ala-1594 → Thr and Val-2236 → Ala in NS4A and NS5A, respectively) eliminate two of the three amino acid differences that distinguish the pGBV-B/2

sequence from that of the infectious molecular clone (GenBank accession no. AF179612) reported by Bukh *et al.* (1).

\*3' NTR, 3' nontranslated RNA.

1. Bukh, J., Apgar, C. L. & Yanagi, M. (1999) *Virology* **262**, 470–478.
